# Supplementary material for: Addendum: Aird, S.D. et al. Coralsnake Venomics: Analyses of Venom Gland Transcriptomes and Proteomes of Six Brazilian Taxa. Toxins 2017, 9(6), 187
Source: MDPI journal article supplement (doi:10.3390/toxins10050172), 2018-04-24
Supplement: s1 [file s1]

|     | Taxon           | ID #                        | Cys | 1 | 10 | 20 | 30 | 40 | 50 | 60 | 70 | 80 |
|-----|-----------------|-----------------------------|-----|---|----|----|----|----|----|----|----|----|
| 1   | B. multiciticus | CAD01082.1                  | 8   | M | Q  | K  | C  | S  | F  | Y  | L  | C  |
| 2   | lenniscatus     | DN102976_c2_g5_i1[m.44748b] | 8   | K | T  | C  | Y  | T  | Y  | Y  | S  | L  |
| 3   | surinamensis    | DN76993_c9_g3_i1[m.15932]   | 8   | K | T  | C  | Y  | T  | Y  | Y  | S  | L  |
| 4   | lenniscatus     | IACJ01125772.1              | 8   | K | T  | C  | Y  | T  | Y  | Y  | S  | L  |
| 5   | lenniscatus     | IACJ01125773.1              | 8   | K | T  | C  | Y  | T  | Y  | Y  | S  | L  |
| 6   | corallinus      | IACJ01130841.1              | 8   | K | T  | C  | Y  | T  | Y  | Y  | S  | L  |
| 7   | paraensis       | IACLO1079828.1              | 8   | R | K  | C  | Y  | T  | Y  | Y  | S  | L  |
| 8   | carvalhoi       | DN60235_c0_g1_i1[m.32902]   | 8   | L | K  | C  | Y  | T  | Y  | Y  | S  | L  |
| 9   | corallinus      | DN80696_c0_g1_i1[m.55758]   | 8   | L | K  | C  | Y  | T  | Y  | Y  | S  | L  |
| 10  | carvalhoi       | DN61350_c0_g1_i1[m.5638]    | 8   | R | K  | C  | L  | I  | G  | K  | D  | G  |
| 11  | paraensis       | DN77416_c16_g5_i1[m.5439]   | 8   | R | K  | C  | L  | I  | G  | K  | D  | G  |
| 12  | surinamensis    | DN3615_c0_g1_i1[m.30250]    | 8   | R | K  | C  | L  | I  | G  | K  | D  | G  |
| 13  | carvalhoi       | IACJ01040496.1              | 8   | L | K  | C  | Y  | T  | Y  | Y  | S  | L  |
| 14  | carvalhoi       | IACJ01021136.1              | 8   | L | K  | C  | Y  | T  | Y  | Y  | S  | L  |
| 15  | carvalhoi       | IACJ01021137.1              | 8   | L | K  | C  | Y  | T  | Y  | Y  | S  | L  |
| 16  | paraensis       | DN82236_c5_g2_i6[m.19162]   | 8   | L | K  | C  | Y  | T  | Y  | Y  | S  | L  |
| 17  | paraensis       | DN82236_c5_g2_i5[m.19161]   | 8   | L | K  | C  | Y  | T  | Y  | Y  | S  | L  |
| 18  | lenniscatus     | DN22601_c0_g1_i1[m.63601]   | 8   | L | K  | C  | Y  | T  | Y  | Y  | S  | L  |
| 19  | surinamensis    | DN74424_c0_g1_i1[m.29481]   | 8   | L | K  | C  | Y  | T  | Y  | Y  | S  | L  |
| 20  | surinamensis    | DN76993_c9_g5_i1[m.15933]   | 8   | L | I  | C  | L  | T  | R  | K  | S  | A  |
| 21  | carvalhoi       | IACJ01112502.1              | 8   | L | I  | C  | L  | T  | R  | K  | S  | A  |
| 22  | carvalhoi       | IACJ01112503.1              | 8   | L | I  | C  | L  | T  | R  | K  | S  | A  |
| 23  | carvalhoi       | DN76297_c37_g7_i1[m.13360]  | 8   | R | K  | C  | L  | T  | K  | F  | S  | P  |
| 24  | surinamensis    | IACN01099384.1              | 8   | T | K  | C  | L  | T  | K  | F  | S  | P  |
| 25  | surinamensis    | IACN01099380.1              | 8   | T | K  | C  | L  | T  | K  | F  | S  | P  |
| 26  | surinamensis    | IACN01099381.1              | 8   | T | K  | C  | L  | T  | K  | F  | S  | P  |
| 27  | lenniscatus     | IACJ01196011.1              | 8   | L | I  | C  | H  | S  | G  | T  | G  | V  |
| 28  | lenniscatus     | DN106632_c0_g2_i1[m.1734]   | 8   | R | Q  | C  | Y  | T  | Y  | Y  | S  | L  |
| 29  | carvalhoi       | IACJ01104479.1              | 8   | R | Q  | C  | Y  | T  | Y  | Y  | S  | L  |
| 30  | carvalhoi       | DN60253_c1_g1_i2[m.32912]   | 8   | R | Q  | C  | Y  | T  | Y  | Y  | S  | L  |
| 31  | carvalhoi       | IACJ01104478.1              | 8   | R | Q  | C  | Y  | T  | Y  | Y  | S  | L  |
| 32  | carvalhoi       | DN60253_c1_g1_i1[m.32911]   | 8   | R | Q  | C  | Y  | T  | Y  | Y  | S  | L  |
| 33  | lenniscatus     | IACJ01004849.1              | 8   | R | Q  | C  | Y  | T  | Y  | Y  | S  | L  |
| 34  | surinamensis    | IACN01044203.1              | 8   | R | Q  | C  | Y  | T  | Y  | Y  | S  | L  |
| 35  | surinamensis    | DN66432_c0_g1_i1[m.13902]   | 8   | R | Q  | C  | Y  | T  | Y  | Y  | S  | L  |
| 36  | lenniscatus     | IACJ01177736.1              | 8   | I | V  | C  | Y  | T  | Y  | Y  | S  | L  |
| 37  | lenniscatus     | IACJ01177735.1              | 8   | I | V  | C  | Y  | T  | Y  | Y  | S  | L  |
| 38  | paraensis       | IACLO1009336.1              | 8   | I | T  | C  | I  | V  | T  | Y  | Y  | S  |
| 39  | lenniscatus     | IACJ01193830.1              | 8   | I | T  | C  | I  | V  | T  | Y  | Y  | S  |
| 40  | corallinus      | IACJ01155601.1              | 8   | I | T  | C  | I  | V  | T  | Y  | Y  | S  |
| 41  | corallinus      | IACJ01079595.1              | 8   | I | T  | C  | I  | V  | T  | Y  | Y  | S  |
| 42  | paraensis       | IACLO1054039.1              | 8   | I | T  | C  | I  | V  | T  | Y  | Y  | S  |
| 43  | paraensis       | IACLO1055592.1              | 8   | R | I  | C  | Y  | T  | Y  | Y  | S  | L  |
| 44  | lenniscatus     | DN160706_c1_g1_i1[m.30964]  | 8   | M | I  | C  | Y  | T  | Y  | Y  | S  | L  |
| 45  | paraensis       | IACLO1031945.1              | 8   | M | I  | C  | Y  | T  | Y  | Y  | S  | L  |
| 46  | paraensis       | DN75316_c2_g8_i1[m.34085]   | 8   | R | I  | C  | Y  | T  | Y  | Y  | S  | L  |
| 47  | lenniscatus     | IACJ01096291.1              | 8   | R | I  | C  | Y  | T  | Y  | Y  | S  | L  |
| 48  | lenniscatus     | IACJ01096292.1              | 8   | R | I  | C  | Y  | T  | Y  | Y  | S  | L  |
| 49  | lenniscatus     | IACJ01096258.1              | 8   | R | I  | C  | Y  | T  | Y  | Y  | S  | L  |
| 50  | paraensis       | IACLO1094771.1              | 8   | R | I  | C  | Y  | T  | Y  | Y  | S  | L  |
| 51  | paraensis       | IACLO1094772.1              | 8   | R | I  | C  | Y  | T  | Y  | Y  | S  | L  |
| 52  | surinamensis    | IACN01070783.1              | 8   | M | I  | C  | Y  | T  | Y  | Y  | S  | L  |
| 53  | lenniscatus     | DN150997_c9_g4_i2[m.45848]  | 8   | R | I  | C  | Y  | T  | Y  | Y  | S  | L  |
| 54  | lenniscatus     | DN120340_c19_g5_i1[m.46961] | 8   | M | I  | C  | Y  | T  | Y  | Y  | S  | L  |
| 55  | surinamensis    | IACN01070774.1              | 8   | M | I  | C  | Y  | T  | Y  | Y  | S  | L  |
| 56  | surinamensis    | IACN01070781.1              | 8   | M | I  | C  | Y  | T  | Y  | Y  | S  | L  |
| 57  | surinamensis    | IACN01070787.1              | 8   | M | I  | C  | Y  | T  | Y  | Y  | S  | L  |
| 58  | surinamensis    | IACN01070779.1              | 8   | M | I  | C  | Y  | T  | Y  | Y  | S  | L  |
| 59  | lenniscatus     | IACJ01215853.1              | 8   | L | I  | C  | Y  | T  | Y  | Y  | S  | L  |
| 60  | corallinus      | IACJ01051156.1              | 8   | L | I  | C  | Y  | T  | Y  | Y  | S  | L  |
| 61  | spixii          | IACJ01029625.1              | 8   | L | I  | C  | Y  | T  | Y  | Y  | S  | L  |
| 62  | lenniscatus     | IACJ01179260.1              | 8   | L | I  | C  | Y  | T  | Y  | Y  | S  | L  |
| 63  | corallinus      | IACJ01157476.1              | 8   | L | I  | C  | Y  | T  | Y  | Y  | S  | L  |
| 64  | surinamensis    | IACN01117436.1              | 8   | L | I  | C  | Y  | T  | Y  | Y  | S  | L  |
| 65  | corallinus      | IACJ01157475.1              | 8   | L | I  | C  | Y  | T  | Y  | Y  | S  | L  |
| 66  | surinamensis    | IACN01037374.1              | 8   | L | I  | C  | Y  | T  | Y  | Y  | S  | L  |
| 67  | spixii          | IACJ01029627.1              | 8   | L | I  | C  | Y  | T  | Y  | Y  | S  | L  |
| 68  | lenniscatus     | IACJ01201489.1              | 8   | L | I  | C  | Y  | T  | Y  | Y  | S  | L  |
| 69  | lenniscatus     | IACJ01201491.1              | 8   | L | I  | C  | Y  | T  | Y  | Y  | S  | L  |
| 70  | lenniscatus     | IACJ01201488.1              | 8   | L | I  | C  | Y  | T  | Y  | Y  | S  | L  |
| 71  | lenniscatus     | IACJ01201490.1              | 8   | L | I  | C  | Y  | T  | Y  | Y  | S  | L  |
| 72  | surinamensis    | IACN01037378.1              | 8   | L | I  | C  | Y  | T  | Y  | Y  | S  | L  |
| 73  | corallinus      | IACJ01062272.1              | 8   | L | I  | C  | Y  | T  | Y  | Y  | S  | L  |
| 74  | surinamensis    | IACN01019457.1              | 8   | M | I  | C  | Y  | T  | Y  | Y  | S  | L  |
| 75  | corallinus      | IACJ01062273.1              | 8   | L | I  | C  | Y  | T  | Y  | Y  | S  | L  |
| 76  | carvalhoi       | IACJ01080068.1              | 8   | L | I  | C  | Y  | T  | Y  | Y  | S  | L  |
| 77  | lenniscatus     | IACJ01034486.1              | 8   | L | I  | C  | Y  | T  | Y  | Y  | S  | L  |
| 78  | paraensis       | IACJ01034485.1              | 8   | L | I  | C  | Y  | T  | Y  | Y  | S  | L  |
| 79  | paraensis       | DN7425_c2_g1_i1[m.10435]    | 8   | L | I  | C  | Y  | T  | Y  | Y  | S  | L  |
| 80  | surinamensis    | IACN01030449.1              | 8   | L | I  | C  | Y  | T  | Y  | Y  | S  | L  |
| 81  | corallinus      | IACJ01062270.1              | 8   | L | I  | C  | Y  | T  | Y  | Y  | S  | L  |
| 82  | surinamensis    | IACN01044395.1              | 8   | L | I  | C  | Y  | T  | Y  | Y  | S  | L  |
| 83  | corallinus      | IACJ01062269.1              | 8   | L | I  | C  | Y  | T  | Y  | Y  | S  | L  |
| 84  | corallinus      | IACJ01060045.1              | 8   | M | I  | C  | Y  | T  | Y  | Y  | S  | L  |
| 85  | corallinus      | IACJ01060046.1              | 8   | L | I  | C  | Y  | T  | Y  | Y  | S  | L  |
| 86  | carvalhoi       | IACJ01064821.1              | 8   | M | I  | C  | Y  | T  | Y  | Y  | S  | L  |
| 87  | carvalhoi       | IACJ01044572.1              | 8   | M | I  | C  | Y  | T  | Y  | Y  | S  | L  |
| 88  | surinamensis    | IACN01070777.1              | 8   | M | I  | C  | Y  | T  | Y  | Y  | S  | L  |
| 89  | corallinus      | IACJ01062267.1              | 8   | M | I  | C  | Y  | T  | Y  | Y  | S  | L  |
| 90  | surinamensis    | IACN01070786.1              | 8   | M | I  | C  | Y  | T  | Y  | Y  | S  | L  |
| 91  | surinamensis    | IACN01070784.1              | 8   | M | I  | C  | Y  | T  | Y  | Y  | S  | L  |
| 92  | corallinus      | IACJ01062266.1              | 8   | M | I  | C  | Y  | T  | Y  | Y  | S  | L  |
| 93  | lenniscatus     | IACJ01096229.1              | 8   | M | I  | C  | Y  | T  | Y  | Y  | S  | L  |
| 94  | surinamensis    | IACN01070782.1              | 8   | M | I  | C  | Y  | T  | Y  | Y  | S  | L  |
| 95  | lenniscatus     | IACJ01096260.1              | 8   | M | I  | C  | Y  | T  | Y  | Y  | S  | L  |
| 96  | lenniscatus     | IACJ01096247.1              | 8   | M | I  | C  | Y  | T  | Y  | Y  | S  | L  |
| 97  | carvalhoi       | IACJ01044606.1              | 8   | L | I  | C  | Y  | T  | Y  | Y  | S  | L  |
| 98  | carvalhoi       | DN46957_c0_g1_i1[m.16749]   | 8   | L | F  | C  | D  | N  | S  | N  | V  | P  |
| 99  | corallinus      | IACJ01062268.1              | 8   | L | F  | C  | D  | N  | S  | N  | V  | P  |
| 100 | lenniscatus     | DN160990_c0_g1_i1[m.4594]   | 8   | L | F  | C  | D  | N  | S  | N  | V  | P  |
| 101 | surinamensis    | DN74162_c4_g7_i1[m.19874]   | 8   | L | F  | C  | D  | N  | S  | N  | V  | P  |
| 102 | spixii          | DN121601_c0_g1_i1[m.24576]  | 8   | L | F  | C  | D  | N  | S  | N  | V  | P  |
| 103 | spixii          | IACM01029607.1              | 8   | R | I  | C  | D  | D  | S  | N  | I  | P  |
| 104 | lenniscatus     | IACJ01219239.1              | 8   | R | I  | C  | D  | D  | S  | N  | I  | P  |
| 105 | surinamensis    | DN74162_c4_g8_i1[m.19875]   | 8   | R | I  | C  | D  | D  | S  | N  | I  | P  |
| 106 | corallinus      | DN1069_c0_g2_i1[m.27552]    | 8   | R | I  | C  | D  | D  | S  | N  | I  | P  |
| 107 | carvalhoi       | DN3153_c0_g1_i1[m.22938]    | 8   | R | I  | C  | D  | D  | S  | N  | I  | P  |
| 108 | lenniscatus     | IACJ01238287.1              | 8   | R | I  | C  | D  | D  | S  | N  | I  | P  |
| 109 | paraensis       | DN47384_c0_g1_i1[m.3913]    | 8   | R | I  | C  | D  | D  | S  | N  | I  | P  |
| 110 | surinamensis    | DN84091_c0_g2_i1[m.7825]    | 8   | R | I  | C  | D  | D  | S  | N  | I  | P  |
| 111 | corallinus      | IACJ01166686.1              | 8   | R | I  | C  | D  | D  | S  | N  | I  | P  |
| 112 | lenniscatus     | IACJ01240371.1              | 8   | L | I  | C  | D  | D  | S  | N  | I  | P  |
| 113 | carvalhoi       | DN53567_c0_g2_i1[m.12331]   | 8   | L | I  | C  | D  | D  | S  | N  | I  | P  |
| 114 | carvalhoi       | IACJ01044506.1              | 8   | L | I  | C  | D  | D  | S  | N  | I  | P  |
| 115 | carvalhoi       | DN53567_c0_g1_i1[m.12330]   | 8   | L | I  | C  | D  | D  | S  | N  | I  | P  |
| 116 | lenniscatus     | IACJ01240370.1              | 8   | L | I  | C  | D  | D  | S  | N  | I  | P  |
| 117 | lenniscatus     | IACJ01240369.1              | 8   | L | I  | C  | D  | D  | S  | N  | I  | P  |
| 118 | lenniscatus     | IACJ01240368.1              | 8   | L | I  | C  | D  | D  | S  | N  | I  | P  |
| 119 | surinamensis    | DN74162_c4_g3_i1[m.19871]   | 8   | R | I  | C  | D  | D  | S  | N  | I  | P  |
| 120 | corallinus      | IACJ01106191.1              | 8   | L | I  | C  | D  | D  | S  | N  | I  | P  |
| 121 | surinamensis    | DN74162_c4_g2_i1[m.19870]   | 8   | R | I  | C  | D  | D  | S  | N  | I  | P  |
| 122 | surinamensis    | DN74162_c4_g6_i1[m.19873]   | 8   | R | I  | C  | D  | D  | S  | N  | I  | P  |
| 123 | surinamensis    | DN74162_c4_g5_i1[m.19872]   | 8   | R | I  | C  | D  | D  | S  | N  | I  | P  |
| 124 | corallinus      | IACJ01106190.1              | 8   | L | I  | C  | D  | D  | S  | N  | I  | P  |
| 125 | corallinus      | IACJ01106189.1              | 8   | L | I  | C  | D  | D  | S  | N  | I  | P  |
| 126 | corallinus      | IACJ01106192.1              | 8   | L | I  | C  | D  | D  | S  | N  | I  | P  |
| 127 | carvalhoi       | IACJ01064813.1              | 8   | L | K  | C  | Y  | G  | I  | F  | R  | K  |
| 128 | carvalhoi       | IACJ01004755.1              | 8   | L | K  | C  | Y  | V  | S  | Y  | K  | V  |
| 129 | lenniscatus     | IACJ01096254.1              | 8   | L | I  | C  | Y  | V  | S  | Y  | K  | V  |
| 130 | lenniscatus     | IACJ01096250.1              | 8   | L | I  | C  | Y  | V  | S  | Y  | K  | V  |
| 131 | surinamensis    | IACN01021503.1              | 8   | L | K  | C  | Y  | V  | S  | Y  | K  | V  |
| 132 | carvalhoi       | IACJ01004756.1              | 8   | L | I  | C  | Y  | V  | S  | Y  | K  | V  |
| 133 | surinamensis    | IACN01080103.1              | 8   | L | K  | C  | Y  | N  | T  | W  | S  | L  |
| 134 | lenniscatus     | IACJ01227912.1              | 8   | R | K  | C  | Y  | N  | T  | W  | S  | L  |
| 135 | paraensis       | IACJ01051375.               |     |   |    |    |    |    |    |    |    |    |
