# Supplementary material for: Addendum: Aird, S.D. et al. Coralsnake Venomics: Analyses of Venom Gland Transcriptomes and Proteomes of Six Brazilian Taxa. Toxins 2017, 9(6), 187
Source: MDPI journal article supplement (doi:10.3390/toxins10050172), 2018-04-24
Supplement: s1 [file s1]

|    | Taxon                   | ID #                        | Cys | 1 | 10 | 20 | 30 | 40 | 50 | 60 |   |   |   |   |   |   |   |   |   |   |   |   |   |   |   |   |   |   |   |   |   |   |   |   |   |   |   |   |   |   |   |   |   |   |   |   |   |   |   |   |   |   |   |   |   |   |   |   |   |   |   |   |   |   |   |   |   |   |   |   |   |   |
|----|-------------------------|-----------------------------|-----|---|----|----|----|----|----|----|---|---|---|---|---|---|---|---|---|---|---|---|---|---|---|---|---|---|---|---|---|---|---|---|---|---|---|---|---|---|---|---|---|---|---|---|---|---|---|---|---|---|---|---|---|---|---|---|---|---|---|---|---|---|---|---|---|---|---|---|---|---|
|    | <i>B. multincinctus</i> | CAD01082.1                  | 10  | M | Q  | C  | K  | T  | C  | S  | F | Y | T | C | P | N | S | E | T | C | P | D | G | K | N | I | C | V | K | R | S | W | T | A | V | R | G | D | G | P | K | R | E | I | R | R | E | C | A | A | T | C | P | P | S | K | L | G | L | T | V | F | C | C | T | T | D | N | C | N | H | * |
| 1  | <i>surinamensis</i>     | IACN01019456.1              | 9   | I | L  | C  | Y  | N  | H  | Q  | A | Y | T | R | Q | T | T | E | C | C | Q | I | G | E | T | N | C | Y | R | T | T | W | N | D | H | R | - | - | - | - | G | T | R | I | E | R | G | C | G | - | - | C | H | D | V | K | R | G | I | K | I | K | C | C | S | Y | D | K | C | N | G | * |
| 2  | <i>corallinus</i>       | IACJ01051157.1              | 9   | I | L  | C  | Y  | N  | H  | Q  | A | Y | T | R | Q | T | T | E | C | C | Q | I | G | E | T | N | C | Y | R | T | T | W | N | D | H | R | - | - | - | - | G | T | R | I | E | R | G | C | G | - | - | C | Y | E | V | K | P | G | V | Q | M | K | C | C | K | T | D | K | C | N | D | * |
| 3  | <i>lemniscatus</i>      | IACK01168435.1              | 9   | I | L  | C  | Y  | N  | H  | Q  | A | Y | T | R | Q | T | T | E | C | C | Q | I | G | E | T | N | C | Y | R | T | T | W | N | D | H | R | - | - | - | - | G | T | R | I | E | R | G | C | G | - | - | C | P | Y | V | K | P | G | V | K | I | N | C | C | T | T | D | K | C | N | A | * |
| 4  | <i>spixii</i>           | IACM01128650.1              | 9   | I | L  | C  | Y  | N  | H  | Q  | A | Y | T | R | Q | T | T | E | C | C | Q | I | G | E | T | N | C | Y | R | T | T | W | N | D | H | R | - | - | - | - | G | T | R | I | E | R | G | C | G | - | - | C | P | Y | V | K | P | G | V | K | I | N | C | C | T | T | D | K | C | N | A | * |
| 5  | <i>paraensis</i>        | IACL01074030.1              | 9   | L | L  | C  | Y  | T  | H  | M  | S | N | S | A | E | T | T | E | C | C | Q | N | G | K | T | T | C | Y | T | K | I | W | T | D | V | R | - | - | - | - | G | T | V | I | E | R | G | C | G | - | - | C | P | D | K | K | Y | G | G | K | I | N | C | C | A | T | D | K | C | N | S | * |
| 6  | <i>lemniscatus</i>      | DN94862_c6_g3_i1 m.609649   | 9   | L | L  | C  | Y  | T  | H  | M  | S | N | S | A | E | T | T | E | C | C | Q | N | G | K | T | T | C | Y | T | K | I | W | S | D | F | R | - | - | - | - | G | T | V | I | E | R | G | C | G | - | - | C | P | D | K | K | Y | G | G | K | I | N | C | C | A | T | D | K | C | N | S | * |
| 7  | <i>lemniscatus</i>      | IACK01171799.1              | 9   | L | L  | C  | Y  | T  | H  | M  | S | N | S | A | E | T | T | E | C | C | Q | N | G | K | T | T | C | Y | T | K | I | W | S | D | F | R | - | - | - | - | G | T | V | I | E | R | G | C | G | - | - | C | P | D | K | K | Y | G | G | K | I | N | C | C | A | T | D | K | C | N | S | * |
| 8  | <i>surinamensis</i>     | IACN01118586.1              | 9   | L | L  | C  | Y  | T  | H  | M  | S | N | S | A | E | T | T | E | C | C | Q | N | G | K | T | T | C | Y | T | K | I | W | S | D | F | R | - | - | - | - | G | T | V | I | E | R | G | C | G | - | - | C | P | D | K | K | Y | G | G | K | I | N | C | C | K | T | D | R | C | N | S | * |
| 9  | <i>spixii</i>           | IACM01029744.1              | 9   | L | L  | C  | Y  | T  | H  | M  | S | N | S | D | E | T | T | E | C | C | Q | N | G | M | T | T | C | Y | N | K | I | W | S | D | F | R | - | - | - | - | G | T | V | I | E | R | G | C | G | - | - | C | P | K | T | E | Y | R | V | K | I | T | C | C | Q | T | D | K | C | N | R | * |
| 10 | <i>paraensis</i>        | IACL01074031.1              | 9   | L | L  | C  | Y  | T  | H  | M  | S | N | S | D | E | T | T | E | C | C | Q | N | G | M | T | T | C | Y | N | K | I | W | S | D | F | R | - | - | - | - | G | T | V | I | E | R | G | C | G | - | - | C | P | K | T | E | Y | R | V | K | I | T | C | C | Q | T | D | K | C | N | R | * |
| 11 | <i>surinamensis</i>     | IACN01118591.1              | 9   | L | L  | C  | Y  | T  | H  | M  | S | N | S | A | E | T | T | E | C | C | Q | N | G | M | T | T | C | Y | N | K | I | W | S | D | F | R | - | - | - | - | G | T | V | I | E | R | G | C | G | - | - | C | P | K | T | E | Y | R | V | K | I | T | C | C | Q | T | D | K | C | N | R | * |
| 12 | <i>carvalhoi</i>        | IACI01013364.1              | 9   | L | L  | C  | Y  | T  | H  | M  | S | N | S | D | E | T | T | E | C | C | Q | N | G | M | T | T | C | Y | N | K | I | W | S | D | F | R | - | - | - | - | G | T | V | I | E | R | G | C | G | - | - | C | P | K | T | E | Y | R | V | K | I | T | C | C | Q | T | D | K | C | N | R | * |
| 13 | <i>carvalhoi</i>        | IACI01013363.1              | 9   | L | L  | C  | Y  | T  | H  | M  | S | N | S | D | E | T | T | E | C | C | Q | N | G | K | T | T | C | Y | T | K | I | W | S | D | F | R | - | - | - | - | G | T | V | I | E | R | G | C | G | - | - | C | P | D | K | K | Y | G | G | K | I | N | C | C | Q | T | D | K | C | N | S | * |
| 14 | <i>lemniscatus</i>      | DN94862_c6_g1_i1 m.609639   | 9   | L | L  | C  | Y  | T  | H  | M  | S | N | S | A | E | T | T | E | C | C | Q | N | G | K | T | T | C | Y | T | K | I | W | S | D | F | R | - | - | - | - | G | T | V | I | E | R | G | C | G | - | - | C | P | D | K | K | Y | G | G | K | I | N | C | C | Q | T | D | K | C | N | S | * |
| 15 | <i>lemniscatus</i>      | IACK01171797.1              | 9   | L | L  | C  | Y  | T  | H  | M  | S | N | S | A | E | T | T | E | C | C | Q | N | G | K | T | T | C | Y | T | K | I | W | S | D | F | R | - | - | - | - | G | T | V | I | E | R | G | C | G | - | - | C | P | D | K | K | Y | G | G | K | I | N | C | C | Q | T | D | K | C | N | S | * |
| 16 | <i>paraensis</i>        | IACL01074029.1              | 9   | L | L  | C  | Y  | T  | H  | M  | S | N | S | A | E | T | T | E | C | C | Q | N | G | K | T | T | C | Y | T | K | I | W | S | D | F | R | - | - | - | - | G | T | V | I | E | R | G | C | G | - | - | C | P | D | K | K | Y | G | G | K | I | N | C | C | Q | T | D | K | C | N | S | * |
| 17 | <i>paraensis</i>        | IACL01031944.1              | 9   | - | L  | C  | Y  | N  | H  | M  | S | S | R | P | E | T | T | E | C | C | E | N | G | E | T | T | C | Y | N | K | S | W | N | S | - | - | - | - | - | G | R | I | I | E | R | G | C | G | - | - | C | P | N | V | K | P | G | I | K | L | N | C | C | Q | T | D | R | C | N | G | * |   |
| 18 | <i>paraensis</i>        | IACL01031940.1              | 9   | - | L  | C  | Y  | N  | H  | M  | S | S | R | P | E | T | T | E | C | C | E | N | G | E | T | T | C | Y | N | K | S | W | N | S | - | - | - | - | - | G | R | I | I | E | R | G | C | G | - | - | C | P | N | V | K | P | G | I | K | L | N | C | C | Q | T | D | R | C | N | G | * |   |
| 19 | <i>paraensis</i>        | IACL01031946.1              | 9   | - | L  | C  | Y  | N  | H  | M  | S | S | R | P | E | T | T | E | C | C | E | N | G | E | T | T | C | Y | N | K | S | W | N | S | - | - | - | - | - | G | R | I | I | E | R | G | C | G | - | - | C | P | N | V | K | P | G | I | K | L | N | C | C | Q | T | D | R | C | N | S | * |   |
| 20 | <i>surinamensis</i>     | IACN01111607.1              | 9   | L | L  | C  | Y  | N  | H  | M  | S | S | R | P | E | T | T | E | C | C | E | N | G | E | T | T | C | Y | N | K | S | W | N | S | - | - | - | - | - | G | R | I | I | E | R | G | C | G | - | - | C | P | N | V | K | P | G | I | K | L | N | C | C | Q | T | D | R | C | N | S | * |   |
| 21 | <i>surinamensis</i>     | IACN01070775.1              | 9   | L | L  | C  | Y  | N  | H  | M  | S | S | R | P | E | T | T | E | C | C | E | N | G | M | T | T | C | Y | E | K | S | W | R | E | T | R | S | S | F | S | G | T | I | I | D | R | G | C | G | - | - | C | P | N | V | K | P | G | T | K | L | N | C | C | K | T | D | R | C | N | G | * |
| 22 | <i>corallinus</i>       | IACJ01138868.1              | 9   | L | I  | C  | Y  | N  | D  | H  | G | Y | T | G | K | T | T | E | C | C | E | N | G | M | T | T | C | Y | E | K | S | W | R | E | T | R | S | S | F | S | G | T | I | I | D | R | G | C | G | - | - | C | P | N | V | K | P | G | I | K | L | N | C | C | Q | T | D | R | C | N | S | * |
| 23 | <i>spixii</i>           | IACM01029760.1              | 9   | L | I  | C  | Y  | N  | D  | H  | G | Y | T | G | K | T | T | E | C | C | E | N | G | M | T | T | C | Y | E | K | S | W | R | E | T | R | S | S | F | S | G | T | I | I | D | R | G | C | G | - | - | C | P | N | V | K | P | G | T | K | L | N | C | C | K | T | D | R | C | N | G | * |
| 24 | <i>paraensis</i>        | DN109051_c0_g1_i1 m.1919    | 9   | L | I  | C  | Y  | N  | D  | H  | G | Y | T | G | K | T | T | E | C | C | E | N | G | M | T | T | C | Y | E | K | S | W | R | E | T | R | S | S | F | S | G | T | I | I | D | R | G | C | G | - | - | C | P | N | V | K | P | G | T | K | L | N | C | C | K | T | D | R | C | N | G | * |
| 25 | <i>corallinus</i>       | IACJ01138867.1              | 9   | L | I  | C  | Y  | N  | D  | H  | G | Y | T | G | K | T | T | E | C | C | E | N | G | M | T | T | C | Y | E | K | S | W | R | E | T | R | S | S | F | S | G | T | I | I | D | R | G | C | G | - | - | C | P | N | V | K | P | G | T | K | L | N | C | C | K | T | D | R | C | N | G | * |
| 26 | <i>lemniscatus</i>      | DN109162_c2_g1_i3 m.11006   | 9   | L | I  | C  | Y  | N  | D  | H  | G | Y | T | G | K | T | T | E | C | C | E | N | G | M | T | T | C | Y | E | K | S | W | R | E | T | R | S | S | F | S | G | T | I | I | D | R | G | C | G | - | - | C | P | N | V | K | P | G | T | K | L | N | C | C | K | T | D | R | C | N | G | * |
| 27 | <i>lemniscatus</i>      | IACK01096299.1              | 9   | L | L  | C  | Y  | T  | H  | M  | S | N | S | A | E | T | T | E | C | C | Q | N | G | L | T | T | C | F | Q | Q | S | W | R | D | I | R | - | - | - | - | G | D | R | I | E | R | G | C | G | - | - | C | P | D | E | K | K | G | I | E | L | K | C | C | K | T | D | R | C | N | G | * |
| 28 | <i>corallinus</i>       | IACJ01062274.1              | 9   | L | L  | C  | F  | N  | D  | H  | G | Y | I | G | K | T | T | E | C | C | Q | N | G | L | T | T | C | F | Q | Q | S | W | R | D | I | R | - | - | - | - | G | D | R | I | E | R | G | C | G | - | - | C | P | K | V | K | P | G | I | Q | I | N | C | C | T | T | E | K | C | N | G | * |
| 29 | <i>lemniscatus</i>      | DN120340_c190_g2_i7 m.46960 | 9   | R | I  | C  | Y  | N  | D  | H  | G | Y | I | G | K | T | T | E | T | C | E | D | G | I | T | I | C | Y | Q | Q | S | W | R | D | F | R | - | - | - | - | G | D | R | I | E | R | G | C | G | - | - | C | P | D | E | K | K | G | I | E | L | K | C | C | N | C | D | K | C | N | G | * |
| 30 | <i>corallinus</i>       | IACJ01062275.1              | 9   | L | L  | C  | F  | N  | D  | H  | G | Y | I | G | K | T | T | E | C | C | Q | N | G | L | T | T | C | F | Q | Q | S | W | R | D | I | R | - | - | - | - | G | D | R | I | E | R | G | C | G | - | - | C | P | D | E | K | K | G | I | E | L | K | C | C | K |   |   |   |   |   |   |   |
