# Supplementary material for: Addendum: Aird, S.D. et al. Coralsnake Venomics: Analyses of Venom Gland Transcriptomes and Proteomes of Six Brazilian Taxa. Toxins 2017, 9(6), 187
Source: MDPI journal article supplement (doi:10.3390/toxins10050172), 2018-04-24
Supplement: s1 [file s1]

| Seq. | Taxon                  | ID #                      | Cys | 1 | 10 |   |   |   |   |   |   |   |   |   | 20 | 30 |   |   |   |   |   |   |   |   |   | 40 | 50 |   |   |   |   |   |   |   |   |   | 60 | 70 |   |   |   |   |   |   |   |   |   |   |   |   |   |   |   |   |   |   |   |   |   |   |   |   |   |   |   |   |   |   |   |   |   |   |   |   |   |
|------|------------------------|---------------------------|-----|---|----|---|---|---|---|---|---|---|---|---|----|----|---|---|---|---|---|---|---|---|---|----|----|---|---|---|---|---|---|---|---|---|----|----|---|---|---|---|---|---|---|---|---|---|---|---|---|---|---|---|---|---|---|---|---|---|---|---|---|---|---|---|---|---|---|---|---|---|---|---|---|
|      | <i>B. multicinctus</i> | CAD01082.1                | 10  | M | Q  | C | K | T | C | S | F | Y | T | C | P  | N  | S | E | T | - | - | C | P | D | G | K  | N  | I | C | V | K | R | S | W | T | A | V  | R  | G | D | G | P | K | R | E | I | R | R | E | C | A | A | T | C | P | P | - | S | K | L | G | L | T | V | F | C | C | T | T | D | N | C | N | H |   |
| 1    | <i>corallinus</i>      | IACJ01056796.1            | 10  | L | T  | C | K | T | C | P | F | N | T | C | A  | D  | S | E | T | - | - | C | P | V | G | K  | N  | I | C | Y | Q | R | K | W | N | E | H  | S  | G | - | - | - | - | K | K | I | E | R | G | C | V | A | N | C | P | E | L | G | S | H | D | T | F | L | L | C | C | R | R | D | N | C | N | * |   |
| 2    | <i>corallinus</i>      | IACJ01056795.1            | 10  | L | T  | C | K | T | C | P | F | N | T | C | A  | D  | S | E | T | - | - | C | P | V | G | K  | N  | I | C | Y | Q | R | K | W | N | E | N  | N  | G | - | - | - | - | K | K | I | E | R | G | C | V | A | N | C | P | E | L | G | S | H | D | T | S | L | L | C | C | R | R | D | D | C | N | * |   |
| 3    | <i>carvalhoi</i>       | IACI01112741.1            | 10  | L | T  | C | K | T | C | P | F | N | T | C | A  | D  | S | E | T | - | - | C | P | V | G | K  | N  | I | C | Y | Q | R | K | W | N | E | N  | N  | G | - | - | - | - | K | K | I | E | R | R | C | V | A | N | C | P | E | L | G | S | H | D | T | S | L | L | C | C | R | R | D | D | C | N | * |   |
| 4    | <i>lemniscatus</i>     | DN97447_c0_g1_i1 m.63038  | 10  | L | T  | C | K | T | C | P | F | N | T | C | A  | D  | S | E | T | - | - | C | P | V | G | K  | N  | I | C | Y | Q | R | K | W | N | E | N  | N  | G | - | - | - | - | K | K | I | E | R | G | C | V | A | N | C | P | E | L | G | S | H | D | T | S | L | L | C | C | R | R | D | D | C | N | * |   |
| 5    | <i>paraensis</i>       | DN86421_c0_g1_i1 m.1945   | 10  | L | T  | C | H | T | C | P | Y | N | T | C | A  | N  | S | E | T | - | - | C | P | A | G | K  | N  | I | C | Y | Q | K | K | W | E | E | H  | Q  | G | - | - | - | - | E | R | I | E | R | S | C | V | A | N | C | P | E | F | E | S | S | H | S | S | L | L | C | C | T | T | A | N | C | N | * |   |
| 6    | <i>lemniscatus</i>     | DN169781_c2_g1_i1 m.39582 | 10  | L | T  | C | H | T | C | P | Y | N | T | C | A  | N  | S | E | T | - | - | C | P | A | G | K  | N  | I | C | Y | Q | K | K | W | E | E | H  | Q  | G | - | - | - | - | E | R | I | E | R | S | C | V | A | N | C | P | E | F | E | S | S | H | S | S | L | L | C | C | T | T | A | N | C | N | * |   |
| 7    | <i>carvalhoi</i>       | IACI01044515.1            | 10  | L | T  | C | H | T | C | P | Y | N | T | C | A  | N  | S | E | T | - | - | C | P | A | G | K  | N  | I | C | Y | Q | K | K | W | E | E | H  | Q  | G | - | - | - | - | E | R | I | E | R | S | C | V | A | N | C | P | E | F | E | S | S | H | S | S | L | L | C | C | T | T | A | N | C | N | * |   |
| 8    | <i>carvalhoi</i>       | IACI01115070.1            | 10  | L | T  | C | H | T | C | P | Y | N | T | C | A  | N  | S | E | T | - | - | C | P | A | G | K  | N  | I | C | Y | Q | K | K | W | E | E | H  | Q  | G | - | - | - | - | E | R | I | E | R | S | C | V | A | N | C | P | E | F | E | S | S | H | S | S | L | L | C | C | T | T | A | N | C | N | * |   |
| 9    | <i>carvalhoi</i>       | IACI01064819.1            | 10  | L | T  | C | H | T | C | P | Y | N | T | C | A  | N  | S | E | T | - | - | C | P | A | G | K  | N  | I | C | Y | K | K | K | W | E | E | H  | Q  | G | - | - | - | - | E | R | I | E | R | S | C | V | A | N | C | P | E | F | E | S | S | H | S | S | L | L | C | C | T | T | A | N | C | N | * |   |
| 10   | <i>corallinus</i>      | IACJ01043429.1:           | 10  | L | T  | C | H | T | C | P | Y | N | T | C | A  | N  | S | E | T | - | - | C | P | A | G | K  | N  | I | C | Y | Q | K | K | W | E | E | H  | Q  | G | - | - | - | - | E | R | I | E | R | S | C | V | A | N | C | P | E | F | E | S | S | H | S | S | L | L | C | C | T | T | A | N | C | N | * |   |
| 11   | <i>surinamensis</i>    | DN82939_c15_g1_i1 m.13986 | 10  | L | T  | C | H | T | C | P | Y | N | T | C | A  | N  | S | E | T | - | - | C | P | A | G | K  | N  | I | C | Y | Q | K | K | W | E | E | H  | Q  | G | - | - | - | - | E | R | I | E | R | S | C | V | A | N | C | P | E | F | E | S | S | H | S | S | L | L | C | C | T | T | A | N | C | N | * |   |
| 12   | <i>surinamensis</i>    | IACN01100674.1            | 10  | L | E  | C | K | I | C | N | F | K | I | C | Q  | T  | G | E | L | R | H | C | A | S | G | E  | T  | I | C | Y | K | T | F | W | N | T | H  | R  | G | - | - | - | - | L | R | I | D | R | G | C | A | A | T | C | P | I | A | E | N | - | H | D | S | V | E | C | C | A | K | D | N | C | N | N | * |
| 13   | <i>corallinus</i>      | IACJ01101103.1            | 10  | L | E  | C | K | I | C | N | F | K | T | C | P  | T  | D | E | L | R | R | C | A | S | G | E  | T  | I | C | Y | K | T | F | W | N | T | H  | R  | G | - | - | - | - | L | R | I | D | R | G | C | A | A | T | C | P | T | V | K | P | G | - | V | N | I | I | C | C | K | T | D | N | C | N | * |   |
| 14   | <i>lemniscatus</i>     | DN31338_c0_g4_i1 m.63664  | 10  | L | E  | C | K | I | C | N | F | K | T | C | P  | T  | D | E | L | R | R | C | A | S | G | E  | T  | I | C | Y | K | T | F | W | N | T | H  | R  | G | - | - | - | - | L | R | I | D | R | G | C | A | A | T | C | P | T | V | K | P | G | - | V | N | I | I | C | C | K | T | D | N | C | N | * |   |
| 15   | <i>carvalhoi</i>       | DN3636_c0_g1_i1 m.28697   | 10  | L | E  | C | K | I | C | N | F | K | T | C | P  | T  | D | E | L | R | R | C | A | S | G | E  | T  | I | C | Y | K | K | F | W | N | T | P  | H  | G | - | - | - | - | L | R | I | D | R | G | C | A | A | T | C | P | T | V | K | P | G | - | V | N | I | I | C | C | K | T | D | N | C | N | * |   |
| 16   | <i>carvalhoi</i>       | DN3636_c0_g2_i1 m.28698   | 10  | L | E  | C | K | I | C | N | F | K | I | C | Q  | T  | G | E | L | R | H | C | A | S | G | E  | T  | I | C | Y | K | K | F | W | N | T | P  | H  | G | - | - | - | - | L | R | I | D | R | G | C | A | A | T | C | P | T | V | K | P | G | - | V | N | I | I | C | C | K | T | D | N | C | N | * |   |
| 17   | <i>paraensis</i>       | IACL01053498.1            | 10  | L | E  | C | K | I | C | N | F | K | I | C | Q  | T  | G | E | L | R | H | C | A | S | G | E  | T  | I | C | Y | K | K | F | W | N | T | P  | H  | G | - | - | - | - | L | R | I | D | R | G | C | A | A | T | C | P | T | V | K | P | G | - | V | N | I | I | C | C | K | T | D | N | C | N | * |   |
| 18   | <i>paraensis</i>       | IACL01053506.1            | 10  | L |    |   |   |   |   |   |   |   |   |   |    |    |   |   |   |   |   |   |   |   |   |    |    |   |   |   |   |   |   |   |   |   |    |    |   |   |   |   |   |   |   |   |   |   |   |   |   |   |   |   |   |   |   |   |   |   |   |   |   |   |   |   |   |   |   |   |   |   |   |   |   |
